# Supplementary material for: Insights into the O : C-dependent mechanisms controlling the evaporation of α -pinene secondary organic aerosol particles
Source: Copernicus journal article supplement (doi:10.5194/acp-19-4061-2019), 2019-04-02
Supplement: Supplementary file 1 [file acp-19-4061-2019-supplement.pdf]

Supplement of Atmos. Chem. Phys., 19, 4061–4073, 2019  
<https://doi.org/10.5194/acp-19-4061-2019-supplement>  
© Author(s) 2019. This work is distributed under  
the Creative Commons Attribution 4.0 License.

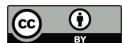

*Supplement of*

## **Insights into the O : C-dependent mechanisms controlling the evaporation of $\alpha$ -pinene secondary organic aerosol particles**

**Angela Buchholz et al.**

*Correspondence to:* Angela Buchholz ([angela.buchholz@uef.fi](mailto:angela.buchholz@uef.fi))

The copyright of individual parts of the supplement might differ from the CC BY 4.0 License.

## Supplement material

### S1.1 FIGAERO-CIMS declustering

As described in section 2.2, we observed a considerable amount of declustered ions in the FIGAERO-CIMS mass spectra. We speculate that a possible declustering process was the removal of HI from  $[M+I]^-$  adducts, leaving behind  $[M-H]^-$  to be detected, e.g., carboxylate anions following the deprotonation of the corresponding carboxylic acids. However, it is also possible that other decomposition reactions occurred, such as decomposition of peroxyacid-iodide adducts into carboxylate anions ( $[M-OH]^-$ ; Lee et al., 2014), decarboxylation  $[M-H-CO_2]^-$  and/or dehydration of carboxylic acids and alcohols  $[M-H-H_2O]^-$  (e.g. Canagaratna et al., 2015; Stark et al., 2017), or cleavage of weak organic peroxide bonds (Iyer et al., 2016; Schobesberger et al., 2018). In general, declustered ions were observed at relatively lower average desorption temperatures. Either the respective parent compounds are, on average, more volatile than compounds observed as  $[M+I]^-$ , or higher desorption temperatures induce decomposition processes that forestall potential CIMS-induced decomposition. Clearly, dedicated studies are warranted to gain a mechanistic understanding of the combination of thermally induced (in the FIGAERO) and collision-induced (in the CIMS) dissociation of ion clusters and/or molecules.

### S1.2 FIGAERO-CIMS instrument background

One to two filter blank measurements were performed in the morning of each experiment day. To illustrate the results of the blank measurements, we show the non-normalised integrated mass spectra for all conducted blank measurements for the low- $O_3C$  case in Figure S6a and b. The non-normalised total thermograms (Figure S6c) clearly show that even for the lowest collected mass (RH80%, RTC case, light blue line) the total signal is still much higher overall than the corresponding blank measurements (purple and pink lines in Figure S6c). Another example is presented in Figure S7: the non-normalised integrated mass spectra for the high- $O_3C$  cases. On that day, only one blank measurement was performed. It is apparent that a few ions are clearly elevated in this blank measurement, but generally the ion abundances observed during measurements are much higher than those in the background spectra.

We have categorised background signals in the FIGAERO-CIMS measurements into two types: 1) compounds being emitted from the filter/set-up during the desorption, especially at the highest desorption temperatures, and 2) compounds accumulated on the filter from ambient air while in “idle” position (no flow through filter but inlet open to room air). Type 1 compounds should be relatively constant throughout an experiment day, but the abundance of type 2 compounds will depend on how long the filter has been in the idle position and will be removed with each heating cycle (including the 1-2 initial blank measurements). The first filter blank measurement in the morning was conducted after 10 - 14 h of idle time overnight with the second blank following within a few minutes after the first one. During the following experiments of the day, there were typically 1 - 2 h between the end of desorption of one sample and the collection of the next. Thus, the first blank should be considered as an upper limit of contamination/background (both with type 1 and 2 compounds) while the second one may be

seen as the lower limit for type 1 compounds (and a second measure of the upper limit for type 2 compounds). As the lengths of idle times were so different, the morning filter blank measurements are not fully representative of the situation throughout the day. Therefore, subtracting the available blank measurements from the corresponding experiment data was deemed to be impractical, especially in those cases where only one blank measurement was available, as for some ion signals the blank subtraction would lead to negative signal values, which are unphysical. However, we carefully compared the difference spectra for uncorrected data (Figure 3c and d) and data which had the maximum background subtracted (panels a and b). When removing the estimated upper limit of instrument background, the overall patterns in the difference spectra stay the same. 90% of the ions exhibit a change of less than  $1 \cdot 10^{-4}$  for the values in the difference spectra. For some ions, the increases/decreases due to humidification/evaporation become even more prominent. This finding combined with the fact that the quality and availability of blank measurements varied between SOA types, we decided to show the uncorrected difference spectra in the main manuscript depicting the minimum change to be expected due to humidification and/or evaporation.

### S1.3 FIGAERO-CIMS average values

For the FIGAERO data, the average composition and elemental ratios were derived from the identified sum formula for each ion. The average composition (average number of C, H, and O atoms) was calculated as the signal weighted sum:

$$composition = \sum_i (C_i \cdot f_i), \sum_i (H_i \cdot f_i), \sum_i (O_i \cdot f_i) \quad (S1)$$

With  $C_i$ ,  $H_i$ , and  $O_i$  being the number of C, H, and O atoms in the sum formula for each ion  $i$  and  $f_i$  the normalised signal of the ion  $i$ , i.e., the count rate of ion  $i$  normalising to the sum over all non-reagent ions.

For each identified sum formula, the O:C and H:C ratios were calculated. The average O:C and H:C ratios were calculated as the signal weighted sum of these:

$$\overline{O:C} = \sum_i ((O:C)_i \cdot f_i) \quad (S2)$$

$$\overline{H:C} = \sum_i ((H:C)_i \cdot f_i) \quad (S3)$$

with  $(O:C)_i$  (or  $(H:C)_i$ ) being the O:C (or H:C) ratio calculated from the sum formula of each ion  $i$  and  $f_i$  the normalised signal of the ion  $i$ . Note that this is not the same as the ratio of O and C in the average composition.

### S1.4 Modelling of evaporation

The evaporation inside the RTC was modelled with two different process models. The models were used together with an optimization algorithm to investigate if the difference in evaporation between 80% and 40% RH can be explained by the solution effect (Raoult's law). In both models the particle composition was presented with a one-dimensional VBS (Donahue et al., 2006) with 6 compounds or 'bins' spanning from  $10^{-3} \mu\text{g m}^{-3}$  to  $10^2 \mu\text{g m}^{-3}$  with a decade difference between two adjacent

bins. The evaporation at RH40% and RH80% was modelled with a liquid-like evaporation model (LLEVAP; Yli-Juuti et al. (2017)) where the particles are assumed to behave like well-mixed liquids. Thus, the limiting step in evaporation is the transport of mass between particle and gas phases. The evaporation under dry conditions was modelled with a slightly modified version of the kinetic multi-layer model for gas-particle interactions in aerosols and clouds (KM-GAP, Shiraiwa et al., 2012; Yli-Juuti et al., 2017). In KM-GAP, the viscosity in each layer of the particle was expressed with a mixing rule (O'Meara et al., 2016):

$$\log_{10}(\eta_j) = \sum_{i=1}^N X_{mole,i,j} \log_{10}(b_i) \quad (S4)$$

where  $\eta_j$  is the viscosity in the  $j$ th layer,  $X_{mole,i,j}$  is the molar fraction of the  $i$ th compound in  $j$ th layer, and  $b_i$  is a coefficient that describes how much compound  $i$  affects the viscosity. The particle phase diffusion coefficients were calculated from the viscosity with the Stokes-Einstein equation. Both models assume ideal solution and calculate the water uptake based on continuous equilibrium between gas and particle phase (Yli-Juuti et al., 2017). In all simulation cases, the molar masses of each bin were set to 200 g mol<sup>-1</sup>, particle phase densities to 1200 kg m<sup>-3</sup>, and gas phase diffusion coefficients to 0.05 cm<sup>2</sup> s<sup>-1</sup>.

The two process models were coupled to a global optimization algorithm Monte Carlo Genetic Algorithm (MCGA, Berkemeier et al., 2017). In the optimization process, the free parameters, i.e. the parameters that the MCGA can vary, were the mole fraction of each VBS bin when the particles enter the residence time chamber and the coefficients  $b_i$  in Eq. S4. The MCGA was set to seek for a set of free parameters that minimizes the mean-squared-error between the measured and simulated evapograms. For each O:C case, the parameters were optimized simultaneously to evaporation data at RH80% and dry conditions. This yields the initial particle composition in term of the VBS bins assuming that the difference between evaporation rates is controlled by the low particle phase diffusivity in dry conditions. This initial composition is expected to be the same for all humidity conditions due to the experimental procedure. The initial composition was then used in the LLEVAP to simulate evaporation at 40% RH. The resulting evapogram curves are shown in Figure S4 for all experiments.

To validate our assumption of liquid like behaviour at RH40%, we calculated the evaporation curve at RH40% using the starting VBS distribution derived from the RH80% case both with the LLEVAP (assuming liquid-like behaviour) and with the KM-GAP model (assuming mass transfer limitations, applying viscosity derived from dry case). The curves are shown in Figure S4. In the medium- and high-O:C cases, the LLEVAP curve (dashed line) clearly represents the measured data points. In the low-O:C case, LLEVAP represents the early stages of evaporation better while the later part is closer to the KM-GAP curve. In summary, the assumption of liquid like behaviour for RH40% is valid, i.e., the viscosity at RH40% is still low enough for particle phase diffusion not to significantly limit the evaporation.

## S2 SI References

Berkemeier, T., Ammann, M., Krieger, U. K., Peter, T., Spichtinger, P., Pöschl, U., Shiraiwa, M. and Huisman, A. J.: Technical note: Monte Carlo genetic algorithm (MCGA) for model analysis of multiphase chemical kinetics to determine transport and reaction rate coefficients using multiple experimental data sets, *Atmos. Chem. Phys.*, 17(12), 8021–8029, doi:10.5194/acp-17-8021-2017, 2017.

- Canagaratna, M. R., Jimenez, J. L., Kroll, J. H., Chen, Q., Kessler, S. H., Massoli, P., Hildebrandt Ruiz, L., Fortner, E., Williams, L. R., Wilson, K. R., Surratt, J. D., Donahue, N. M., Jayne, J. T. and Worsnop, D. R.: Elemental ratio measurements of organic compounds using aerosol mass spectrometry: Characterization, improved calibration, and implications, *Atmos. Chem. Phys.*, 15(1), 253–272, doi:10.5194/acp-15-253-2015, 2015.
- 5 Iyer, S., Lopez-Hilfiker, F., Lee, B. H., Thornton, J. A. and Kurtén, T.: Modeling the Detection of Organic and Inorganic Compounds Using Iodide-Based Chemical Ionization, *J. Phys. Chem. A*, 120(4), 576–587, doi:10.1021/acs.jpca.5b09837, 2016.
- Lee, B. H., Lopez-Hilfiker, F. D., Mohr, C., Kurtén, T., Worsnop, D. R. and Thornton, J. A.: An iodide-adduct high-resolution time-of-flight chemical-ionization mass spectrometer: Application to atmospheric inorganic and organic compounds, *Environ. Sci. Technol.*, 48(11), 6309–6317, doi:10.1021/es500362a, 2014.
- 10 O’Meara, S., Topping, D. O. and McFiggans, G.: The rate of equilibration of viscous aerosol particles, *Atmos. Chem. Phys.*, 16(8), 5299–5313, doi:10.5194/acp-16-5299-2016, 2016.
- Schobesberger, S., D’Ambro, E. L., Lopez-Hilfiker, F. D., Mohr, C. and Thornton, J. A.: A model framework to retrieve thermodynamic and kinetic properties of organic aerosol from composition-resolved thermal desorption measurements, *Atmos. Chem. Phys.*, 18(20), 14757–14785, doi:10.5194/acp-18-14757-2018, 2018.
- 15 Shiraiwa, M., Pfrang, C., Koop, T. and Pöschl, U.: Kinetic multi-layer model of gas-particle interactions in aerosols and clouds (KM-GAP): Linking condensation, evaporation and chemical reactions of organics, oxidants and water, *Atmos. Chem. Phys.*, 12(5), 2777–2794, doi:10.5194/acp-12-2777-2012, 2012.
- Stark, H., Yatavelli, R. L. N., Thompson, S. L., Kang, H., Krechmer, J. E., Kimmel, J. R., Palm, B. B., Hu, W., Hayes, P. L., Day, D. A., Campuzano-Jost, P., Canagaratna, M. R., Jayne, J. T., Worsnop, D. R. and Jimenez, J. L.: Impact of Thermal Decomposition on Thermal Desorption Instruments: Advantage of Thermogram Analysis for Quantifying Volatility Distributions of Organic Species, *Environ. Sci. Technol.*, 51(15), 8491–8500, doi:10.1021/acs.est.7b00160, 2017.
- 20 Yli-Juuti, T., Pajunoja, A., Tikkanen, O. P., Buchholz, A., Faiola, C., Väisänen, O., Hao, L., Kari, E., Peräkylä, O., Garmash, O., Shiraiwa, M., Ehn, M., Lehtinen, K. and Virtanen, A.: Factors controlling the evaporation of secondary organic aerosol from a-pinene ozonolysis, *Geophys. Res. Lett.*, 44(5), 2562–2570, doi:10.1002/2016GL072364, 2017.
- 25

Table S1: Parameters in the PAM for different experiment settings.

|                                           | low     | medium  | high    |
|-------------------------------------------|---------|---------|---------|
| T / °C                                    | 27      | 27      | 27      |
| RH / %                                    | 40      | 40      | 40      |
| [VOC] / ppb                               | 190     | 190     | 190     |
| [O <sub>3</sub> ] <sub>inlet</sub> / ppm  | 6.6     | 25      | 25      |
| [O <sub>3</sub> ] <sub>outlet</sub> / ppm | 6.4     | 22.2    | 16      |
| OH exposure / cm <sup>-3</sup> s          | 2.54e11 | 6.85e11 | 2.45e12 |
| photochemical age / days                  | 2.0     | 5.3     | 18.9    |

Table S2: FIGAERO sampling and desorption parameters.

|                                         | fresh                         | RTC                           |
|-----------------------------------------|-------------------------------|-------------------------------|
| sampling time / min                     | 20 or 30                      | 20                            |
| sampling flow / lpm                     | 2                             | 10                            |
| collected mass / ng                     | 140 – 300                     | 20 – 70                       |
| desorption time / min                   | ramp: 15<br>soak at 200 C: 15 | ramp: 15<br>soak at 200 C: 15 |
| temperature ramp / °C min <sup>-1</sup> | 12                            | 12                            |

5

Table S3: Estimated collected sample mass on FIGAERO filter

| OH exposure | condition | sample mass / ng |     |
|-------------|-----------|------------------|-----|
|             |           | fresh            | RTC |
| low         | dry       | 178              | 33  |
|             | RH80%     | 186              | 22  |
| medium      | dry       | 239              | 72  |
|             | RH80%     | 258              | 50  |
| high        | dry       | 138              | 46  |
|             | RH80%     | 172              | 30  |

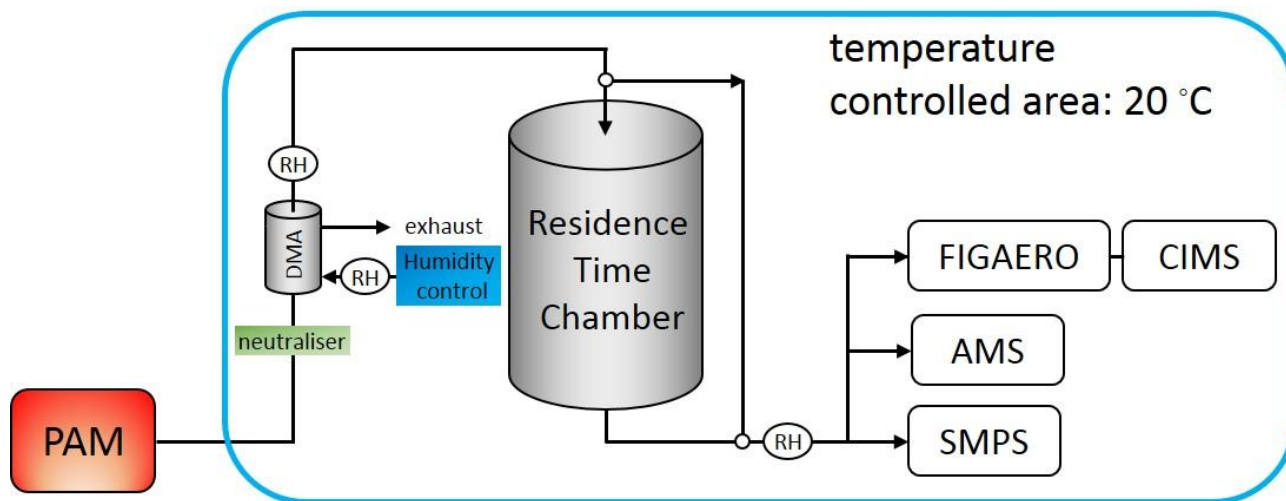

Figure S1: Schematic diagram of the experimental setup used for measuring the rate and extent of evaporation from SOA particles.

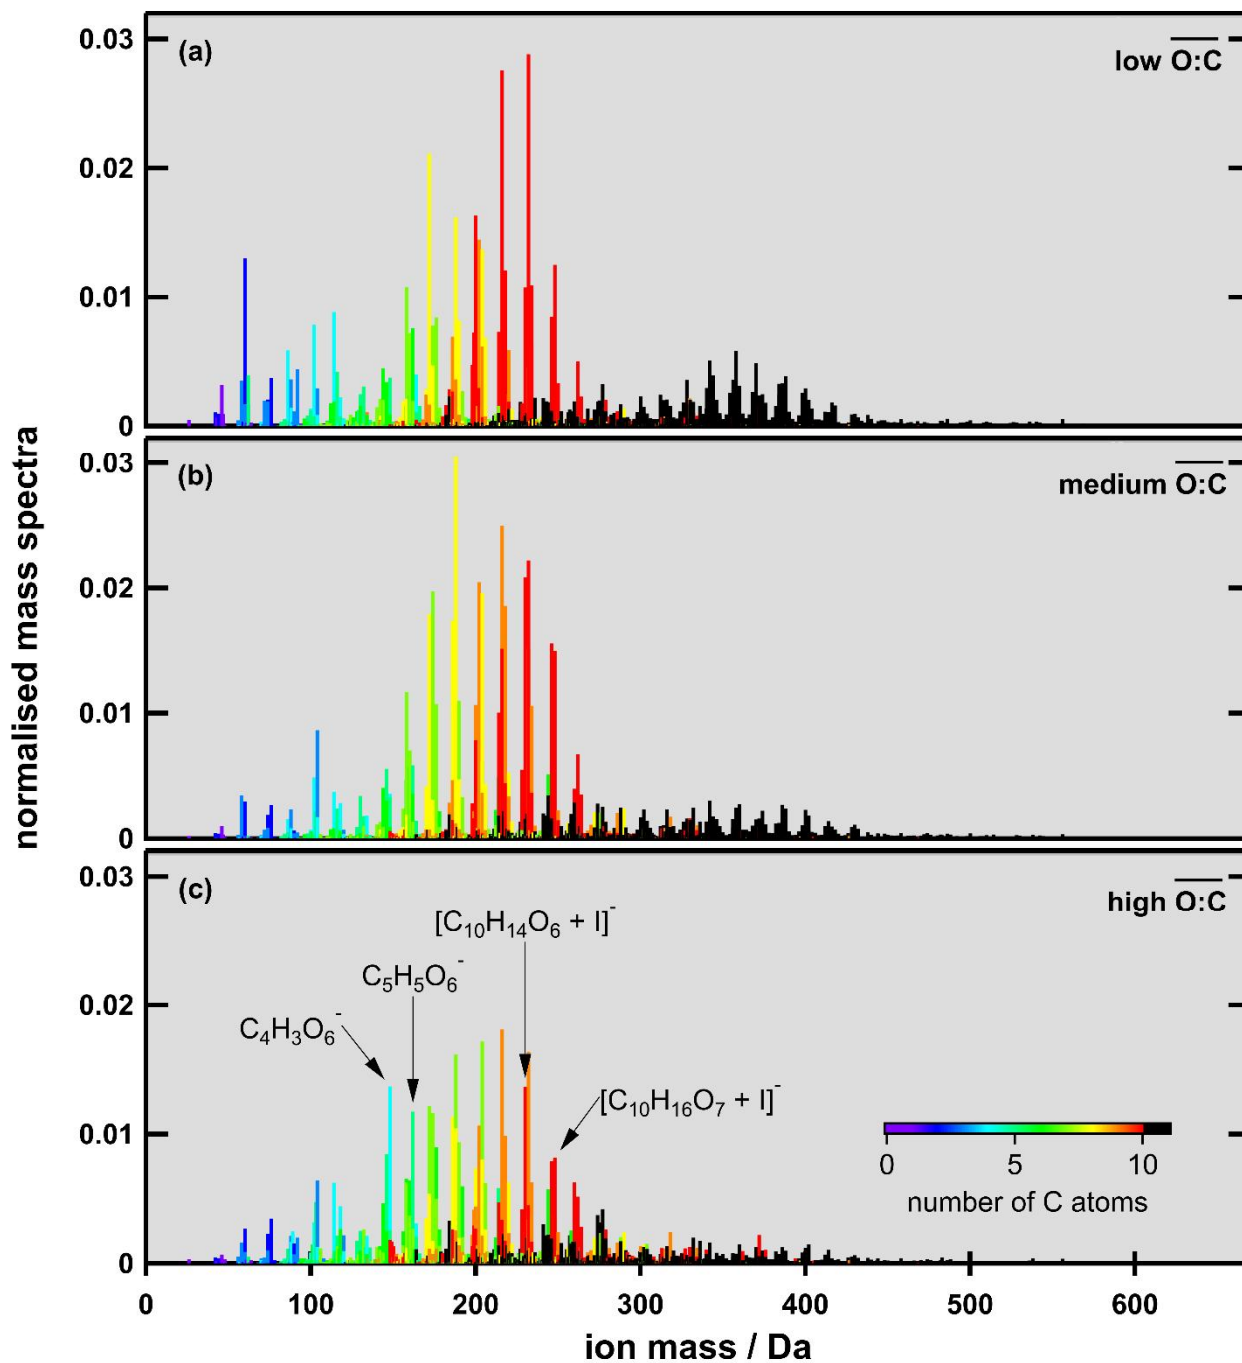

Figure S2: Normalised integrated mass spectra for fresh, dry SOA from low-, medium- and high-O:C cases. Signal is normalised to total signal and colour-coded with the number of C atoms per molecule. Black indicates 11 or more C atoms, which means that these ions stem from the combination of at least two organic molecules (dimers). The contribution of the clustered iodide ions is removed from the plotted ion mass. The ions  $C_4H_3O_6^-$ ,  $C_5H_5O_6^-$ ,  $[C_{10}H_{14}O_6 + I]^-$ , and  $[C_{10}H_{16}O_7 + I]^-$ , which are analysed in more detail in section 3.3 in the main text, are marked for the high-O:C case.

5



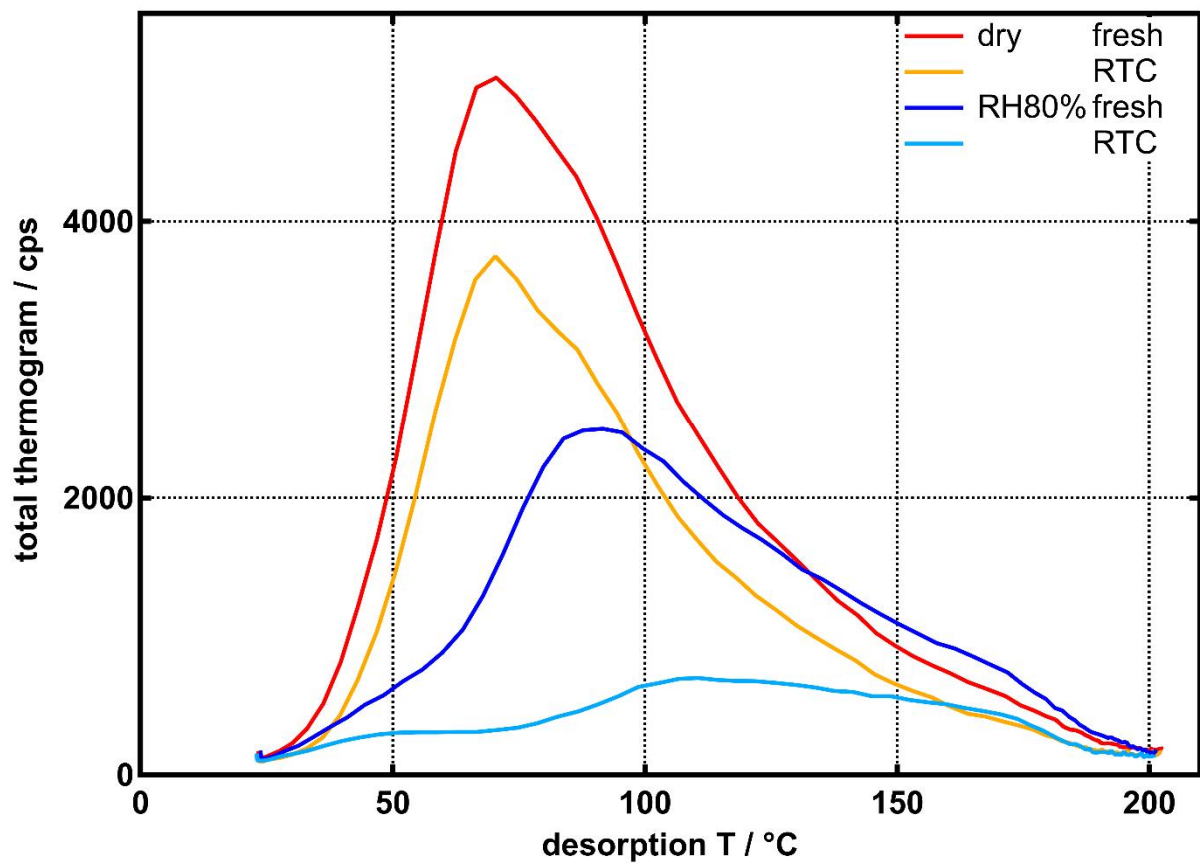

Figure S3: Non-normalised total thermograms for the high-O:C case. RTC refers to particles stored in the RTC for 3 - 4 h before being analysed by FIGAERO-CIMS.

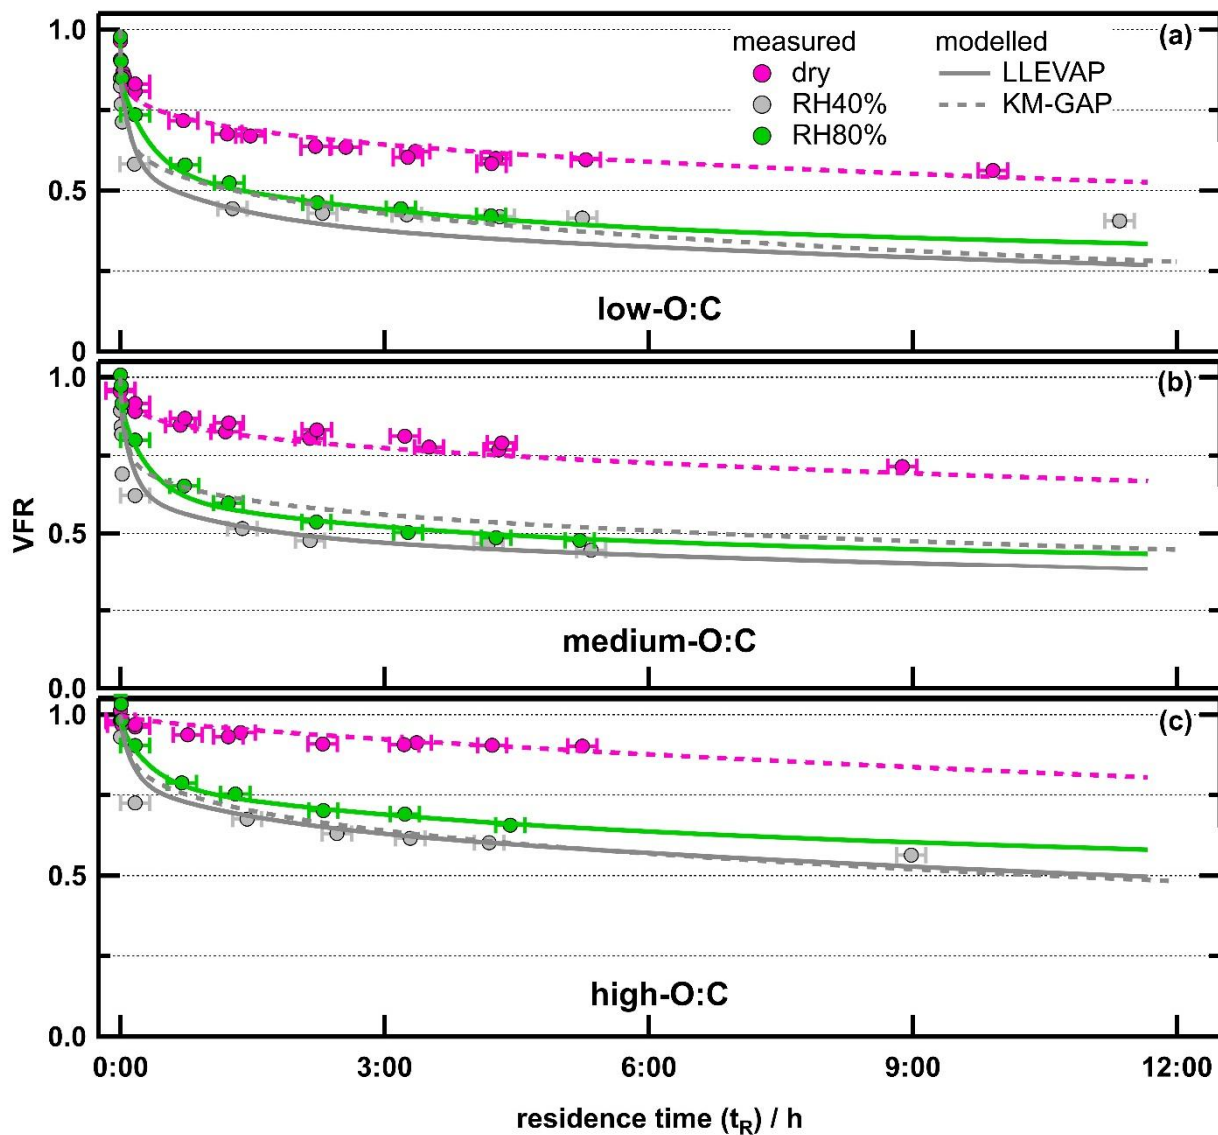

Figure S4: Measured (circles) and modelled (lines) evapograms for all experiment cases. Dashed lines indicated model results using KM-GAP (assuming mass transport limitations in the particles), solid lines are results from LLEVAP (liquid like behaviour).

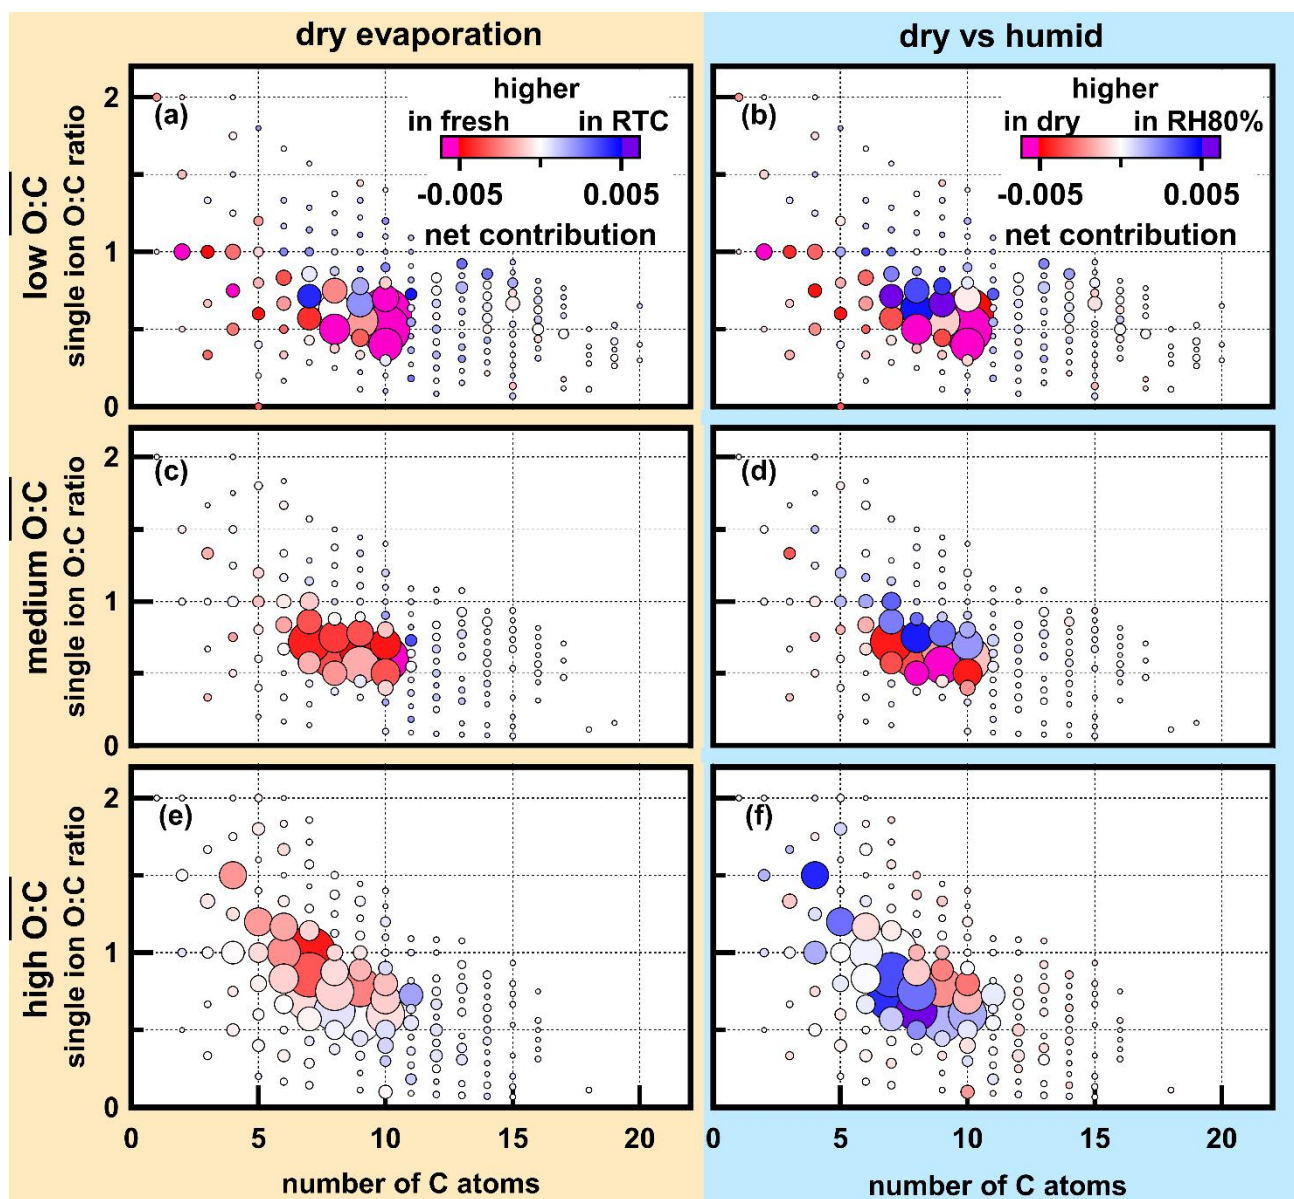

Figure S5: Individual O:C ratios of the detected molecules in normalised integrated mass spectra for dry, fresh SOA particles in low-, medium- and high-O:C cases. All ions with the same O:C ratio for a given carbon chain length were added up. Symbol size indicates signal strength for the dry, fresh SOA case, and colour code illustrates the changes due to isothermal evaporation under dry conditions (panels (a), (c), and (e)) and between fresh SOA under dry and RH80% conditions (panels (b), (d), and (f)). Red colours indicate higher contributions in the fresh, dry case while blue colours indicate a net increase with evaporation or humidification.

5

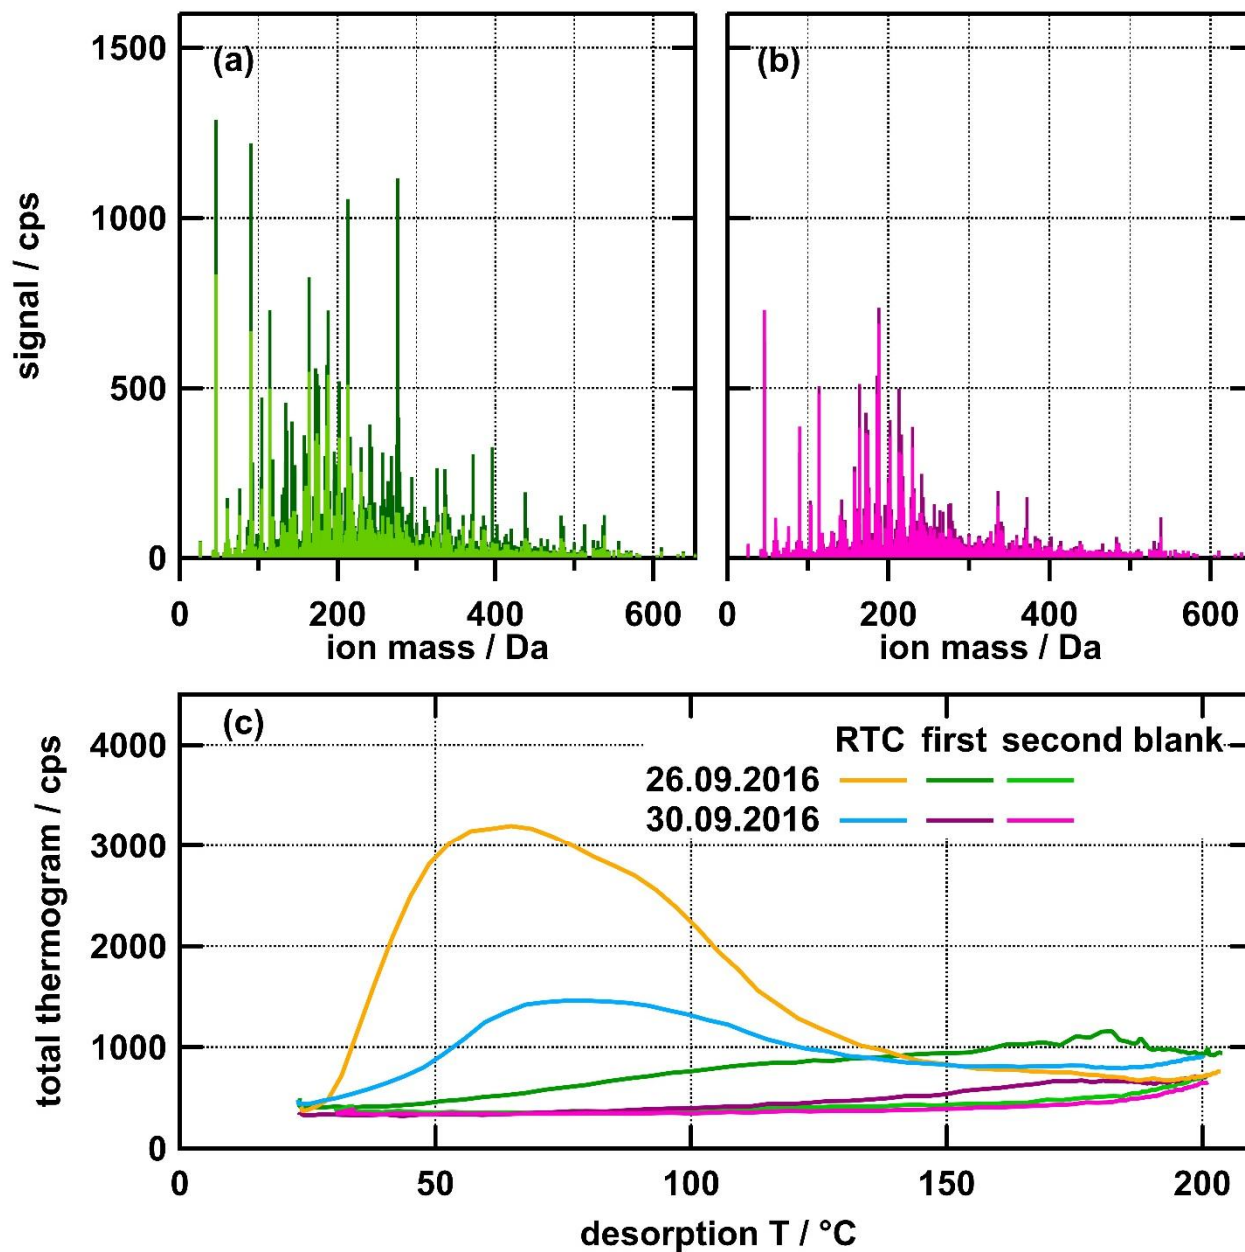

Figure S6: Non-normalised integrated mass spectra of all filter blank measurements for low- $O_2$ C (panels (a) and (b)) and non-normalised total thermograms (c) for filter blanks and measurements after evaporation in the RTC. The colour code is the same in all three panels.

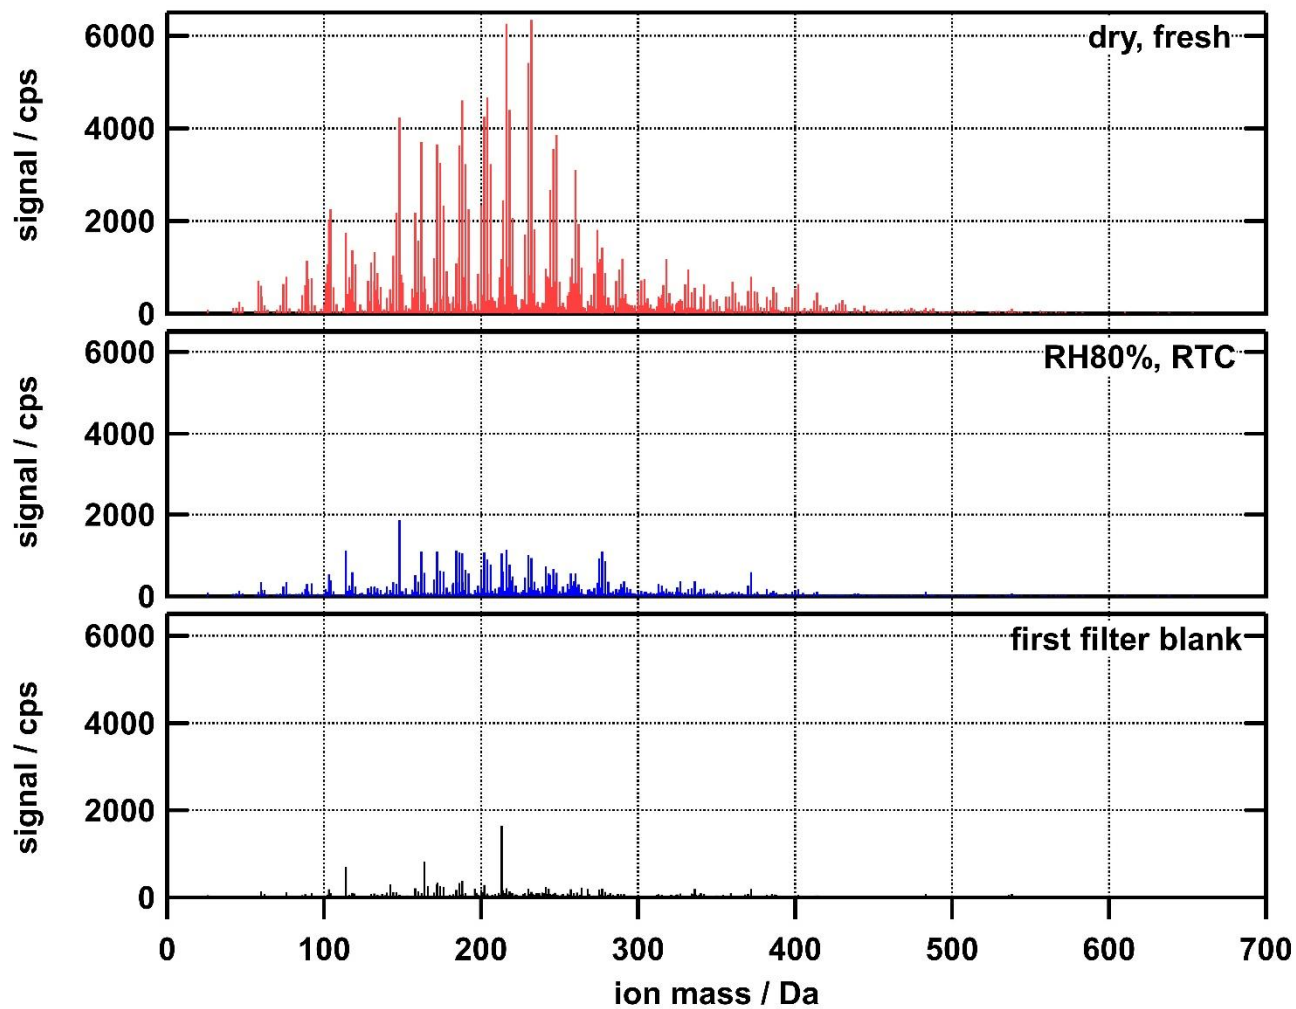

Figure S7: Non-normalised integrated mass spectra for highest (a) and lowest (b) mass loading on the FIGAERO filter in the high- $O_3C$  cases. Panel (c) shows the first filter blank measurement in the morning of that experiment day (i.e. maximum background).
